# Supplementary material
Source: PubMed Central journal article supplement (PMC2986600)
Supplement: ejhg200916x1.pdf [file ejhg200916x1.pdf]

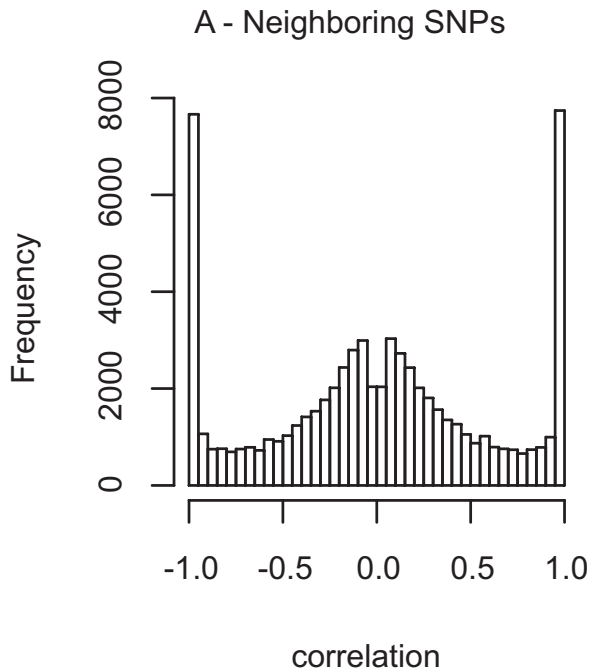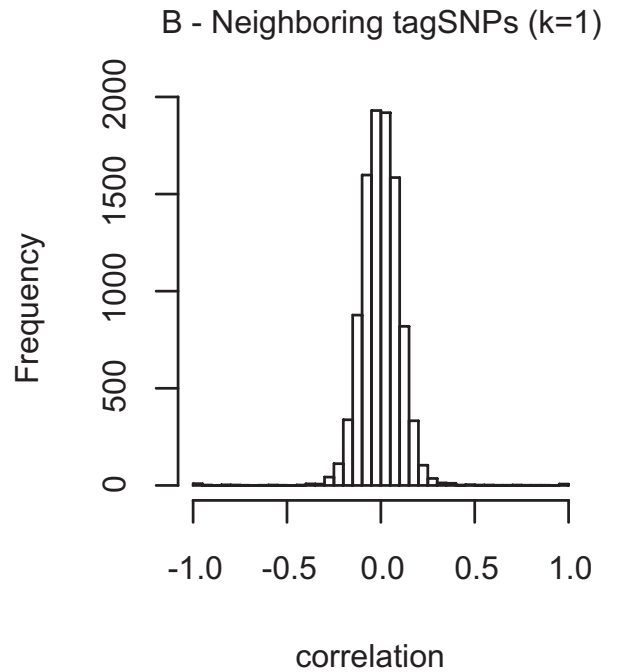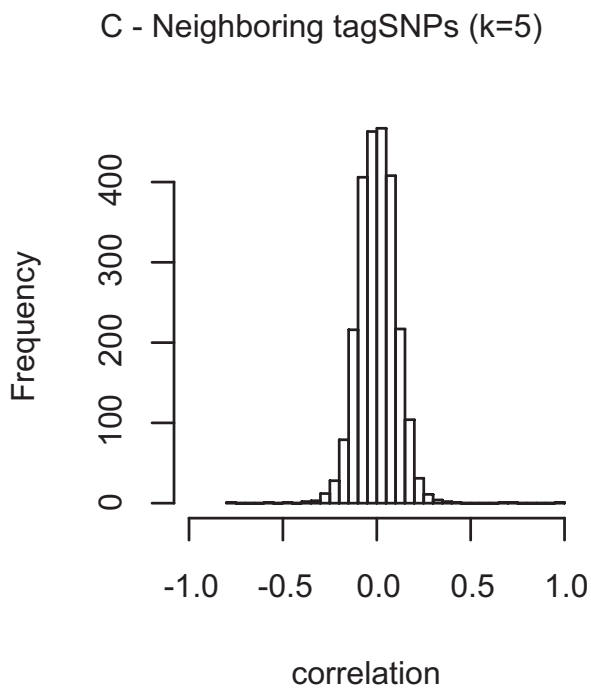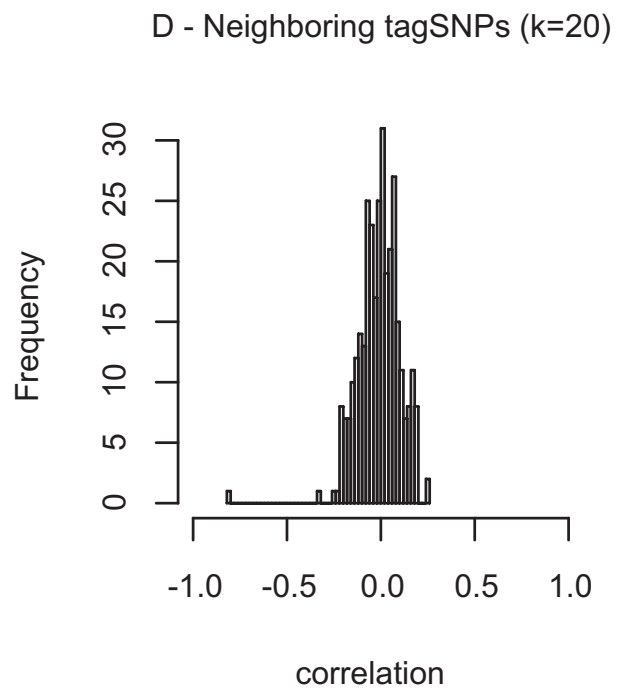

**Supplementary Figure S1:** Results of investigations concerning the independence between all tagSNPs. Panel a illustrates the correlation of neighboring SNPs in general. Panels b to d illustrate the correlation of neighboring tagSNPs exemplary for different values  $k$ . Neighboring loci exhibiting strong linkage show a correlation near to -1 or near to 1.
