# Supplementary material
Source: PubMed Central journal article supplement (PMC2986600)
Supplement: ejhg200916x2.pdf [file ejhg200916x2.pdf]

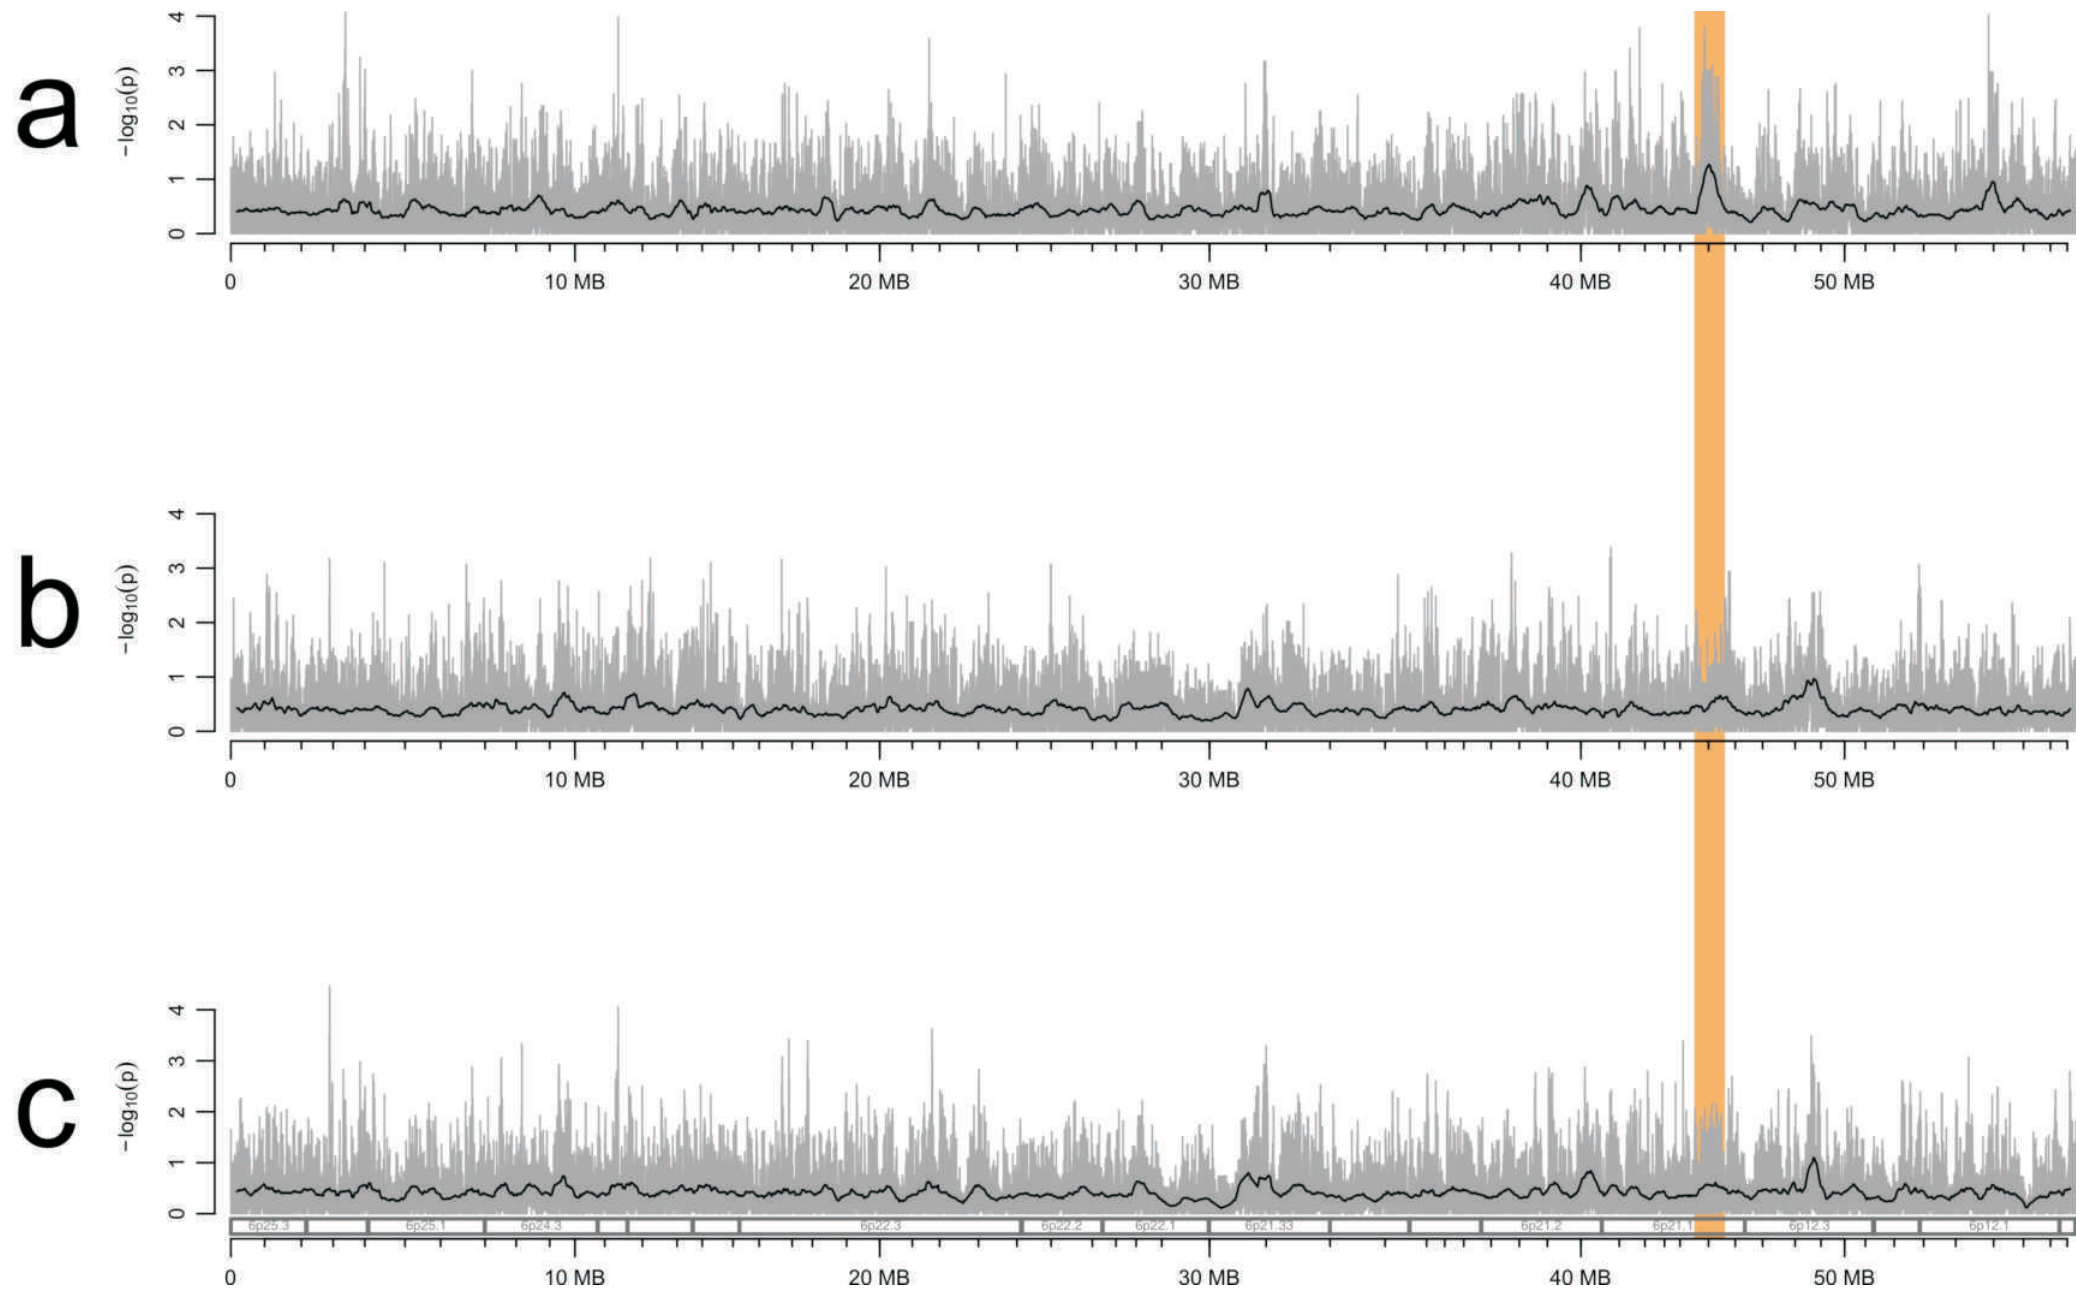

**Supplementary Figure S2:** TD plots for chromosome 6p in the combined CEU and YRI panels, regarding SNPs being polymorphic in both populations. (a) Father-specific, (b) mother-specific, and (c) parent unspecific. The gray bars represent  $-\log_{10}(p)$ -values of the transmission/disequilibrium tests in each SNP, while the smoothing black lines refer to averages of these same results in sliding windows (400 SNPs wide, stepping 10 SNPs after each measurement). Indications for selected cytogenetic bands are given under (c), but apply for all panels. The SMR region is indicated by the orange bar.
