# Supplementary material
Source: PubMed Central journal article supplement (PMC2986600)

**Supplementary Figure S5: Linkage disequilibrium plots of the genomic regions around 7 markers reported to be imprinted and under transmission distortion by Naumova et al., 2001.**

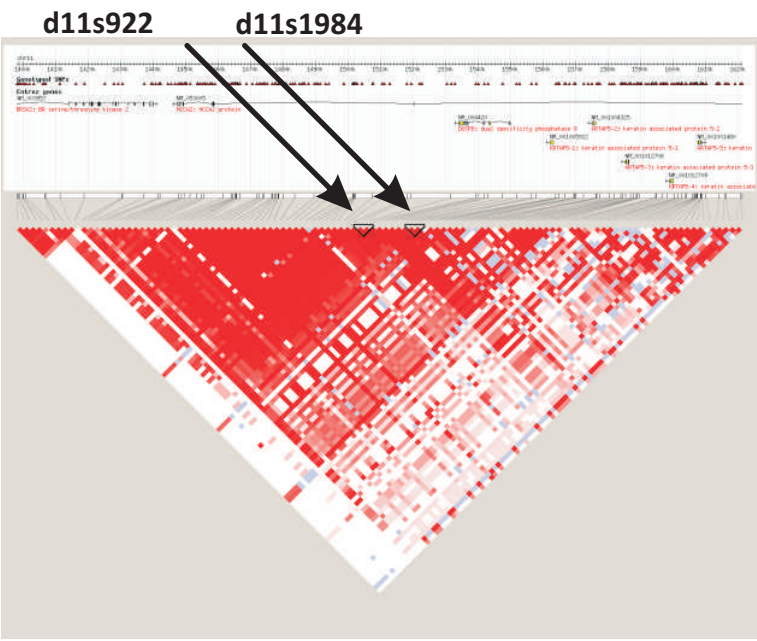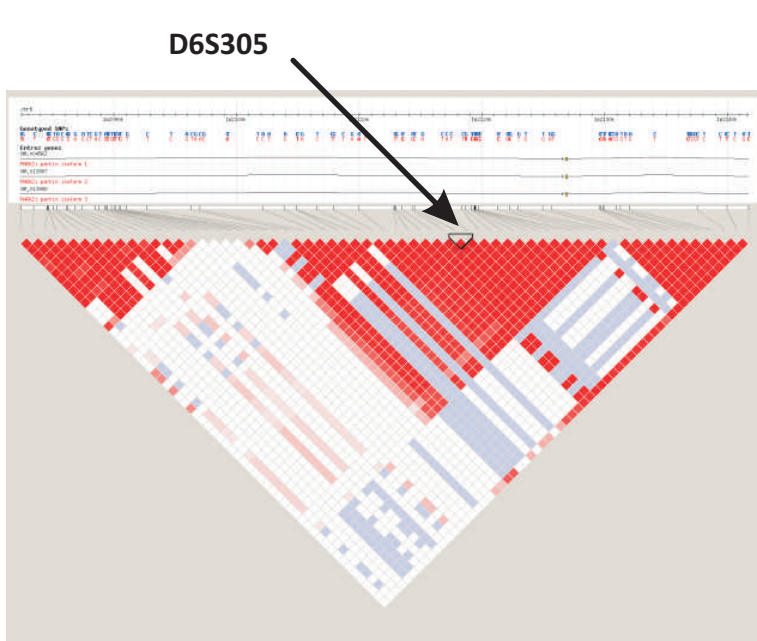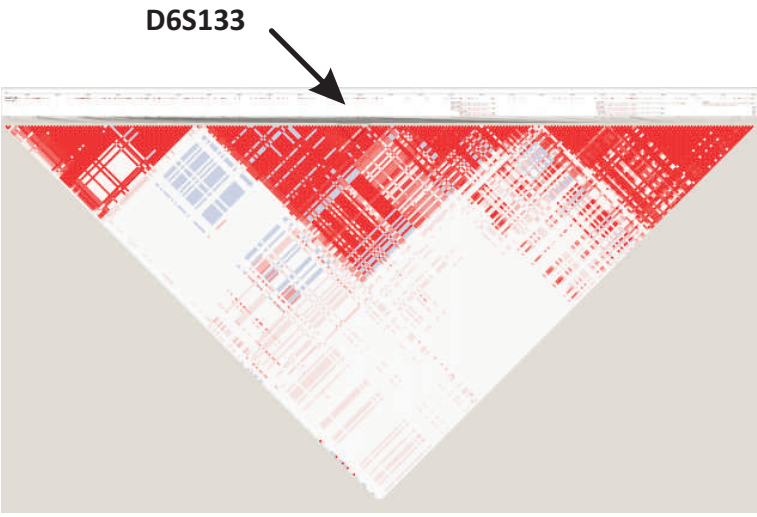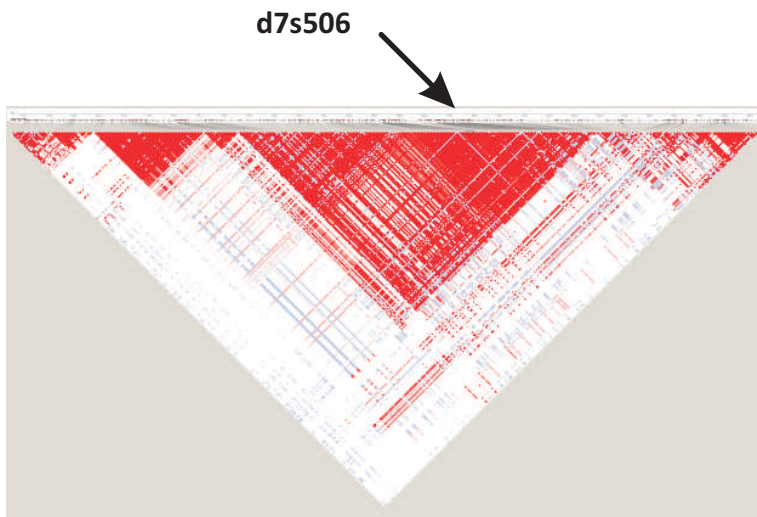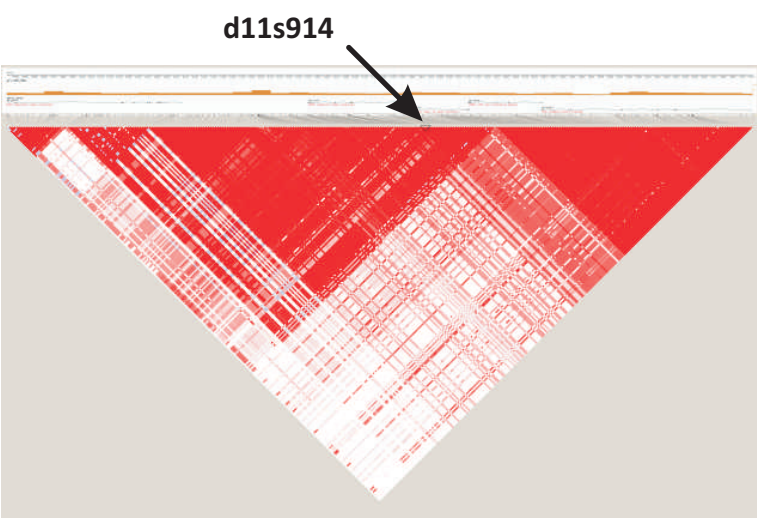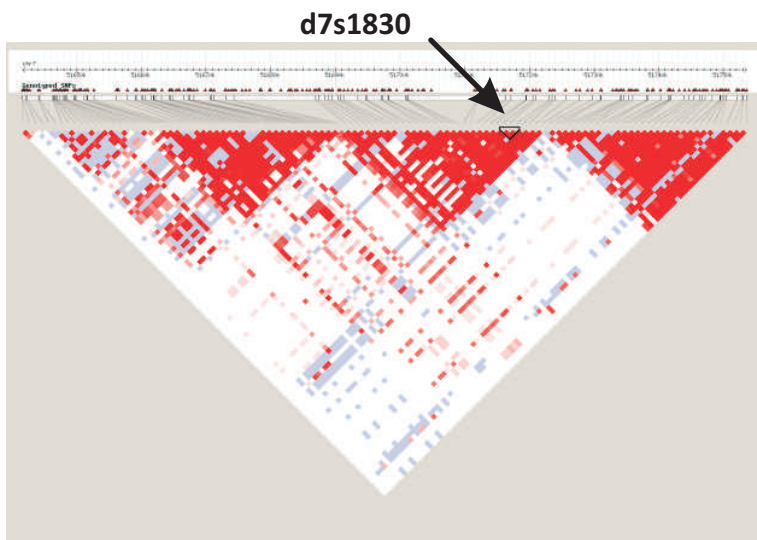

Supplement: ejhg200916x5.pdf [file ejhg200916x5.pdf]
